# Supplementary material
Source: Springer Nature journal article supplement (https://www.springermedizin.de/resource/supplementary/13587_2013_58_MOESM4_ESM.pdf/9677230)

**A.**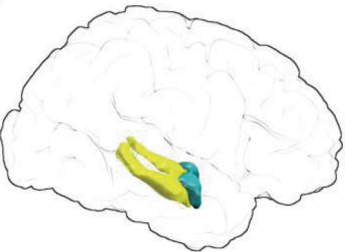**B.**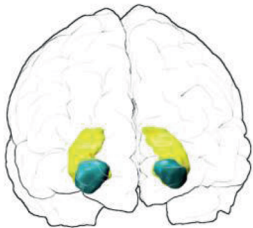**C.**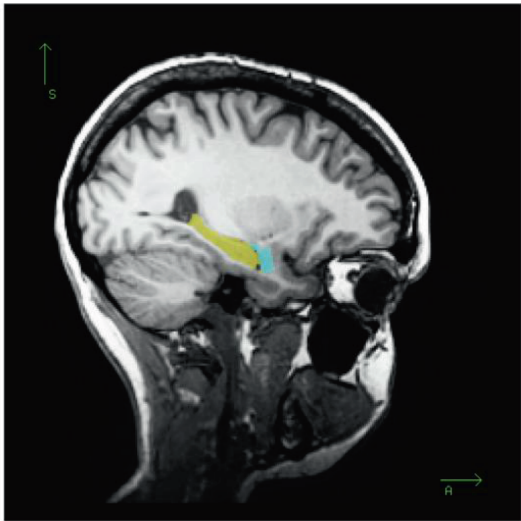

Supplement: MOESM4 [file 9677230]
